# Supplementary material for: A microfluidic-informatics assay for quantitative physical occlusion measurement in sickle cell disease
Source: Royal Society of Chemistry journal article supplement (doi:10.1039/d2lc00043a), 2022-01-01
Supplement: d2lc00043a5.xlsx [file d2lc00043a5.xlsx]

## Sheet: Device Variables
Variable Name	Category	Definition	Note
DSS	Device-derived	Disease Severity Score
Flow-1	Device	(XL)Flow rate@1min
Flow-2	Device	(XL)Flow rate@2min
Flow-5	Device	(XL)Flow rate@5min
Flow-8	Device	(XL)Flow rate@8min
Flow-10	Device	(XL)Flow rate@10min
S-1-0	Device	(S)-@1min-Not Clogged(0)
S-1-1	Device	(S)-@1min-Partially Clogged(1)
S-1-2	Device	(S)-@1min-Fully Clogged(2)
M-1-0	Device	(M)-@1min-Not Clogged(0)
M-1-1	Device	(M)-@1min-Partially Clogged(1)
M-1-2	Device	(M)-@1min-Fully Clogged(2)
L-1-0	Device	(L)-@1min-Not Clogged(0)
L-1-1	Device	(L)-@1min-Partially Clogged(1)
L-1-2	Device	(L)-@1min-Fully Clogged(2)
S-2-0	Device	(S)-@2min-Not Clogged(0)
S-2-1	Device	(S)-@2min-Partially Clogged(1)
S-2-2	Device	(S)-@2min-Fully Clogged(2)
M-2-0	Device	(M)-@2min-Not Clogged(0)
M-2-1	Device	(M)-@2min-Partially Clogged(1)
M-2-2	Device	(M)-@2min-Fully Clogged(2)
L-2-0	Device	(L)-@2min-Not Clogged(0)
L-2-1	Device	(L)-@2min-Partially Clogged(1)
L-2-2	Device	(L)-@2min-Fully Clogged(2)
S-5-0	Device	(S)-@5min-Not Clogged(0)
S-5-1	Device	(S)-@5min-Partially Clogged(1)
S-5-2	Device	(S)-@5min-Fully Clogged(2)
M-5-0	Device	(M)-@5min-Not Clogged(0)
M-5-1	Device	(M)-@5min-Partially Clogged(1)
M-5-2	Device	(M)-@5min-Fully Clogged(2)
L-5-0	Device	(L)-@5min-Not Clogged(0)
L-5-1	Device	(L)-@5min-Partially Clogged(1)
L-5-2	Device	(L)-@5min-Fully Clogged(2)
S-8-0	Device	(S)-@8min-Not Clogged(0)
S-8-1	Device	(S)-@8min-Partially Clogged(1)
S-8-2	Device	(S)-@8min-Fully Clogged(2)
M-8-0	Device	(M)-@8min-Not Clogged(0)
M-8-1	Device	(M)-@8min-Partially Clogged(1)
M-8-2	Device	(M)-@8min-Fully Clogged(2)
L-8-0	Device	(L)-@8min-Not Clogged(0)
L-8-1	Device	(L)-@8min-Partially Clogged(1)
L-8-2	Device	(L)-@8min-Fully Clogged(2)
S-10-0	Device	(S)-@10min-Not Clogged(0)
S-10-1	Device	(S)-@10min-Partially Clogged(1)
S-10-2	Device	(S)-@10min-Fully Clogged(2)
M-10-0	Device	(M)-@10min-Not Clogged(0)
M-10-1	Device	(M)-@10min-Partially Clogged(1)
M-10-2	Device	(M)-@10min-Fully Clogged(2)
L-10-0	Device	(L)-@10min-Not Clogged(0)
L-10-1	Device	(L)-@10min-Partially Clogged(1)
L-10-2	Device	(L)-@10min-Fully Clogged(2)
Flow-1-10	Device	(XL) Flow rate @1min-@10min	Not displayed in Fig.4 for simplification purposes
S-1-02	Device	(S)-@1min-Not Clogged(0) devided by Fully Clogged(2)	Not displayed in Fig.4 for simplification purposes
M-1-02	Device	(M)-@1min-Not Clogged(0) devided by Fully Clogged(2)	Not displayed in Fig.4 for simplification purposes
L-1-02	Device	(L)-@1min-Not Clogged(0) devided by Fully Clogged(2)	Not displayed in Fig.4 for simplification purposes
S-2-02	Device	(S)-@2min-Not Clogged(0) devided by Fully Clogged(2)	Not displayed in Fig.4 for simplification purposes
M-2-02	Device	(M)-@2min-Not Clogged(0) devided by Fully Clogged(2)	Not displayed in Fig.4 for simplification purposes
L-2-02	Device	(L)-@2min-Not Clogged(0) devided by Fully Clogged(2)	Not displayed in Fig.4 for simplification purposes
S-5-02	Device	(S)-@5min-Not Clogged(0) devided by Fully Clogged(2)	Not displayed in Fig.4 for simplification purposes
M-5-02	Device	(M)-@5min-Not Clogged(0) devided by Fully Clogged(2)	Not displayed in Fig.4 for simplification purposes
L-5-02	Device	(L)-@5min-Not Clogged(0) devided by Fully Clogged(2)	Not displayed in Fig.4 for simplification purposes
S-8-02	Device	(S)-@8min-Not Clogged(0) devided by Fully Clogged(2)	Not displayed in Fig.4 for simplification purposes
M-8-02	Device	(M)-@8min-Not Clogged(0) devided by Fully Clogged(2)	Not displayed in Fig.4 for simplification purposes
L-8-02	Device	(L)-@8min-Not Clogged(0) devided by Fully Clogged(2)	Not displayed in Fig.4 for simplification purposes
S-10-02	Device	(S)-@10min-Not Clogged(0) devided by Fully Clogged(2)	Not displayed in Fig.4 for simplification purposes
M-10-02	Device	(M)-@10min-Not Clogged(0) devided by Fully Clogged(2)	Not displayed in Fig.4 for simplification purposes
L-10-02	Device	(L)-@10min-Not Clogged(0) devided by Fully Clogged(2)	Not displayed in Fig.4 for simplification purposes

## Sheet: Cinical Variables
Variable Name	Category	Definition	Note
WBC	CBC	White blood cells
RBC	CBC	Red blood cells
Hemoglobin	CBC	Hemoglobin
Hematocrit	CBC	Hematocrit
MCV	CBC	Mean corpuscular volume
MCH	CBC	Mean corpuscular hemoglobin
MCHC	CBC	Mean corpuscular hemoglobin concentration
RDW-CV	CBC	Red blood cell distribution width
nRBC	CBC	Nucleated red blood cells
Platelets	CBC	Platelets
MPV	CBC	Mean platelet volume
Neutrophils	CBC	Neutrophils
Lymphocytes	CBC	Lymphocytes
Monocytes	CBC	Monocytes
Eosinophils	CBC	Eosinophils
Basophils	CBC	Basophils
ANC	CBC	ANC (Absolute Neutrophil Count)
Lymphocyte Absolute	CBC	Lymphocyte Absolute
Monocyte Absolute Count	CBC	Monocyte Absolute Count
Eosinophil Absolute Count	CBC	Eosinophil Absolute Count
Basophils Absolute	CBC	Basophils Absolute
Immature Granulocytes (Abs)	CBC	Immature Granulocytes (Abs)
nRBC Absolute	CBC	nRBC Absolute
Immature Granulocytes	CBC	Immature Granulocytes
Sodium	Blood Chemistry	Sodium
Potassium	Blood Chemistry	Potassium
Chloride	Blood Chemistry	Chloride
CO2	Blood Chemistry	CO2
Anion Gap	Blood Chemistry	Anion Gap
BUN	Blood Chemistry	Blood urea nitrogen
Creatinine	Blood Chemistry	Creatinine
BUN/Creatinine Ratio	Blood Chemistry	BUN/Creatinine Ratio
Glucose	Blood Chemistry	Glucose
Calcium	Blood Chemistry	Calcium
Total Bilirubin	Blood Chemistry	Total Bilirubin
Alkaline Phosphatase	Blood Chemistry	Alkaline Phosphatase
ALT	Blood Chemistry	Alanine Aminotransferase
AST	Blood Chemistry	Aspartate Aminotransferase
AST/ALT Ratio	Blood Chemistry	AST/ALT Ratio
Total Protein	Blood Chemistry	Total Protein
Albumin	Blood Chemistry	Albumin
Globulin	Blood Chemistry	Globulin
A/G Ratio	Blood Chemistry	Albumin/Globulin Ratio
